# Supplementary material for: TETRAS Spirals and Handwriting Samples: Determination of Optimal Scoring Examples
Source: PubMed Central journal article supplement (PMC8603854; doi:10.5334/tohm.665), 2021-11-16
Supplement: tohm-11-1-665-s3.pdf [file tohm-11-1-665-s3.pdf]

This is a sample of my Best Hand written

0-3

This is a sample of my best handwriting

0-3

This is a sample of my best handwriting

0-3

This is a sample of <sup>my</sup> best handwriting

0-3

This is a sample of my best handwriting

0-3.5

This is a sample of my best handwriting

0-3

This is a sample of my best handwriting.

0-3.5

This is a sample of my best handwriting

0-3
